# Supplementary material
Source: Springer Nature journal article supplement (https://www.springermedizin.de/resource/supplementary/12889_2008_1558_MOESM1_ESM.pdf/9503428)
Supplement: MOESM1 [file 9503428]

**GENERAL INSTRUCTIONS**

The objective of this study is to understand all the relevant events that have happened to your child and any other household member during your [child name]'s fever episode.

**PATIENT'S names**

|             |                                          |
|-------------|------------------------------------------|
| Given name  | <input style="width: 85%;" type="text"/> |
| Family name | <input style="width: 85%;" type="text"/> |

**IN ORDER TO PROTECT PATIENT CONFIDENTIALITY, THIS PAGE WILL BE DETACHED BY THE PROJECT MANAGER OR PRINCIPAL INVESTIGATOR AFTER THE INTERVIEW AND BEFORE THE DATA FROM THIS FORM IS ENTERED INTO A DATABASE. FORMS FROM THE SAME PATIENT SHOULD HAVE THE SAME SUBJECT I.D. NUMBER IN ORDER TO MATCH INFORMATION FROM DIFFERENT FORMS WITH THE SAME STUDY SUBJECT.**

*Please assign in the box the subject I.D. number for the patient (3-digit ID for this study) [e.g. 001, 019, 123]. All forms -interviews of a same patient, should have the SAME SUBJECT I.D. number. Please also write this Subject I.D. number on the top of the next page before detaching this page.*

For the interviewer: Fill in the dates of beginning and end of the [child's name]'s fever episode. The period when the child was sick is called Reference Period of the interview.

| Sun | Mon | Tue | Wed | Thu | Fri | Sat |
|-----|-----|-----|-----|-----|-----|-----|
|     |     |     |     |     |     |     |
|     |     |     |     |     |     |     |
|     |     |     |     |     |     |     |
|     |     |     |     |     |     |     |
|     |     |     |     |     |     |     |

The child started with fever on:  
dd/mm/yyyy : .....//.....//.....

The interview is expected on (..... days later):  
dd/mm/yyyy : .....//.....//.....

Subject I.D. number

Interviewer name

|     |                                                                                                                                         |            |                                          |
|-----|-----------------------------------------------------------------------------------------------------------------------------------------|------------|------------------------------------------|
| A1. | Date of this interview                                                                                                                  | dd/mm/yyyy | <input style="width: 95%;" type="text"/> |
| A2. | When did [child's name]'s start with fever?                                                                                             | dd/mm/yyyy | <input style="width: 95%;" type="text"/> |
| A3. | When did [child's name]'s recover completely from his/her fever episode? If not recovered at the time of the interview, leave it blank. | dd/mm/yyyy | <input style="width: 95%;" type="text"/> |

|     |                    |           |           |                      |          |                                          |
|-----|--------------------|-----------|-----------|----------------------|----------|------------------------------------------|
| A4. | <b>Interviewee</b> | 1. Father | 2. Mother | 3. Father and Mother | 4. Other | <input style="width: 95%;" type="text"/> |
|-----|--------------------|-----------|-----------|----------------------|----------|------------------------------------------|

If interviewing other than father of mother, please specify:  
A5.

**A. PATIENT DEMOGRAPHICS**

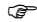

Use the name of the child [child's name] who was or is sick to ask questions

|     |                                                                                                  |                   |                                          |
|-----|--------------------------------------------------------------------------------------------------|-------------------|------------------------------------------|
| A6. | What is [child's name]'s sex?                                                                    | 1. Female 2. Male | <input style="width: 95%;" type="text"/> |
| A7. | How old (in years) was [child's name] at her/his last birthday? (if under age 1, then write "0") | Years             | <input style="width: 95%;" type="text"/> |

**B. FEVER EPISODE**

|     |                                                                                             |              |                                          |
|-----|---------------------------------------------------------------------------------------------|--------------|------------------------------------------|
| B1. | How many days was [child's name] sick?                                                      | Days         | <input style="width: 95%;" type="text"/> |
| B2. | At the time of this interview, is [child's name] still experiencing symptoms such as fever? | 1. Yes 2. No | <input style="width: 95%;" type="text"/> |

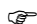

The next two questions are about [child's name]'s overall health.

|     |                                                                               |         |            |        |             |  |
|-----|-------------------------------------------------------------------------------|---------|------------|--------|-------------|--|
| B3. | How would you evaluate [child's name] 's health before this fever episode?    |         |            |        |             |  |
|     | 1. Very good                                                                  | 2. Good | 3. Average | 4. Bad | 5. Very bad |  |
| B4. | How would you evaluate [child's name] 's health during his/her fever episode? |         |            |        |             |  |
|     | 1. Very good                                                                  | 2. Good | 3. Average | 4. Bad | 5. Very bad |  |

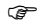

Think about the total number of days that [child's name] was sick:

|     |                                                                |  |
|-----|----------------------------------------------------------------|--|
| B5. | For how many days did [child's name] feel "bad" or "very bad"? |  |
|-----|----------------------------------------------------------------|--|

**C. CARE RECEIVED BY YOUR CHILD DURING HIS/HER FEVER EPISODE**

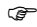

Think about each time [child's name] was seen by a care provider during his illness, and help us to complete the following table with each care received order chronologically.

|                 | Type of provider<br>1. Public<br>2. Private<br>(a) | Type of care<br>1. Emergency Hospitalization<br>2. Health Center<br>3. Pharmacy<br>4. Healer<br>5. Ambulatory visit<br>(b) | Out of pocket spending                            |                                                          | Any reimbursement of your spending by employer, health insurance, government, etc |                                | Number of days fever (g) |
|-----------------|----------------------------------------------------|----------------------------------------------------------------------------------------------------------------------------|---------------------------------------------------|----------------------------------------------------------|-----------------------------------------------------------------------------------|--------------------------------|--------------------------|
|                 |                                                    |                                                                                                                            | Amount spent on the medical provider in RIELS (c) | Amount spent on transportation, meals, etc. In RIELS (d) | 1. Yes<br>2. No<br>(e)                                                            | Amount reimbursed in RIELS (f) |                          |
| Visit one C1.   |                                                    |                                                                                                                            |                                                   |                                                          |                                                                                   |                                |                          |
| Visit two C2.   |                                                    |                                                                                                                            |                                                   |                                                          |                                                                                   |                                |                          |
| Visit three C3. |                                                    |                                                                                                                            |                                                   |                                                          |                                                                                   |                                |                          |
| Visit four C4.  |                                                    |                                                                                                                            |                                                   |                                                          |                                                                                   |                                |                          |
| Visit five C5.  |                                                    |                                                                                                                            |                                                   |                                                          |                                                                                   |                                |                          |

|    |                                                                                                                                              |  |
|----|----------------------------------------------------------------------------------------------------------------------------------------------|--|
| C6 | If your child was hospitalized during the illness episode, please report the total number of nights that your child spent in the hospital(s) |  |
|----|----------------------------------------------------------------------------------------------------------------------------------------------|--|

**D. ILLNESS IMPACT ON HOUSEHOLD MEMBERS**

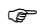

We would like to learn about how [child's name]'s fever episode affected the different members of your family.

|     |                                                   |         |  |
|-----|---------------------------------------------------|---------|--|
| D1. | How many members live in the patient's household? | members |  |
|-----|---------------------------------------------------|---------|--|

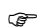

We would like to know the age and sex of the different members of your family, their education, if they are studying or working and if they have lost days of schools or work due to [child's name]'s fever episode.

For level of education of each household member, please use the following codes:

|                          |                                 |                             |                              |
|--------------------------|---------------------------------|-----------------------------|------------------------------|
| 1. No formal education   | 2. Primary school not completed | 3. Primary school completed | 4. High school not completed |
| 5. High school completed | 6. Vocational school            | 7. College or more          |                              |

If you or any of your household member is self-employed and lost days of work, please estimate the amount of income lost (if applicable) for work days off while taking care of [child's name].

For "income lost", include monetary values in local currency.

For each household member who spent time caring for [child's name] when he was sick, please report the number of days of care and the average number of hours per day.

|                            |  |                     |                     |                    |
|----------------------------|--|---------------------|---------------------|--------------------|
| Relation to the sick child |  | CURRENTLY STUDYNG ? | CURRENTLY WORKING ? | CARED FOR PATIENT? |
|----------------------------|--|---------------------|---------------------|--------------------|

|                   | Age in years (a) | Sex<br>1. Female<br>2. Male (b) | Highest education code (c) | Studying (Y/N) (d) | Days of school absence (e) | Working for pay (Y/N) (f) | Days of work absence (g) | Income lost? (Y/N) (h) | Amount lost in RIELS (i) | Number of days (j) | Average daily number of hours (k) |
|-------------------|------------------|---------------------------------|----------------------------|--------------------|----------------------------|---------------------------|--------------------------|------------------------|--------------------------|--------------------|-----------------------------------|
| Sick child D2.    |                  |                                 |                            |                    |                            |                           |                          |                        |                          | N.A.               | N.A.                              |
| Father D3.        |                  |                                 |                            |                    |                            |                           |                          |                        |                          |                    |                                   |
| Mother D4.        |                  |                                 |                            |                    |                            |                           |                          |                        |                          |                    |                                   |
| Grandparent 1 D5. |                  |                                 |                            |                    |                            |                           |                          |                        |                          |                    |                                   |
| Grandparent 2 D6. |                  |                                 |                            |                    |                            |                           |                          |                        |                          |                    |                                   |
| Sibling 1 D7.     |                  |                                 |                            |                    |                            |                           |                          |                        |                          |                    |                                   |
| Sibling 2 D8.     |                  |                                 |                            |                    |                            |                           |                          |                        |                          |                    |                                   |
| Sibling 3 D9.     |                  |                                 |                            |                    |                            |                           |                          |                        |                          |                    |                                   |
| Sibling 4 D10.    |                  |                                 |                            |                    |                            |                           |                          |                        |                          |                    |                                   |
| Other 1 D11.      |                  |                                 |                            |                    |                            |                           |                          |                        |                          |                    |                                   |
| Other 2 D12.      |                  |                                 |                            |                    |                            |                           |                          |                        |                          |                    |                                   |
| Other 3 D13.      |                  |                                 |                            |                    |                            |                           |                          |                        |                          |                    |                                   |

|      |                                                                 |                 |                          |
|------|-----------------------------------------------------------------|-----------------|--------------------------|
| D14. | Was the fever episode of [child's name] during school holidays? | 1. Yes    2. No | <input type="checkbox"/> |
|------|-----------------------------------------------------------------|-----------------|--------------------------|

**E. CHALLENGES DURING THE REFERENCE PERIOD**

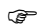

We would like to learn if [child's name] experienced any of the following situation during the fever episode.

|     |                                          |                 |                          |
|-----|------------------------------------------|-----------------|--------------------------|
| E1. | Did [child's name] receive care in time? | 1. Yes    2. No | <input type="checkbox"/> |
| E2. | Did [child's name] need medicines?       | 1. Yes    2. No | <input type="checkbox"/> |

**F. FINANCING THE FEVER EPISODE**

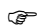

Which of the following financial sources did you use to pay for any health expenditures related to [child's name]'s fever episode episode?

|     |                                                                                                             |                 |                          |
|-----|-------------------------------------------------------------------------------------------------------------|-----------------|--------------------------|
| F1. | Did you use current income of any household member?                                                         | 1. Yes    2. No | <input type="checkbox"/> |
| F2. | Did you use savings (e.g. bank account)?                                                                    | 1. Yes    2. No | <input type="checkbox"/> |
| F3. | Did you have to borrow money from family members or friends from outside the household?                     | 1. Yes    2. No | <input type="checkbox"/> |
| F4. | If yes, specify the monetary amount in RIELS                                                                |                 | <input type="checkbox"/> |
| F5. | Did you have to borrow from someone other than a friend or family?                                          | 1. Yes    2. No | <input type="checkbox"/> |
| F6. | If yes, specify the monetary amount in RIELS                                                                |                 | <input type="checkbox"/> |
| F7. | Did you have to sell or transfer any household items (e.g. animals) to finance the care of [child's name] ? | 1. Yes    2. No | <input type="checkbox"/> |
| F8. | If yes, specify the monetary value.                                                                         |                 | <input type="checkbox"/> |
| F9. | Did you receive help in financing the fever episode of [child's name] from any other party (e.g temple)?    | 1. Yes    2. No | <input type="checkbox"/> |

**G. HOUSING AND FOOD RELATED INDICATORS**

|     |                                                                                                                             |                  |                                               |                          |  |
|-----|-----------------------------------------------------------------------------------------------------------------------------|------------------|-----------------------------------------------|--------------------------|--|
| G1. | How many <b>rooms</b> in the dwelling unit are used by the household (other than kitchen, toilet and bathrooms)             | rooms            | <input type="checkbox"/>                      |                          |  |
| G2. | What is the primary construction material of the <b>outer wall</b> of the housing/dwelling unit occupied by your household? |                  | <input type="checkbox"/>                      |                          |  |
|     | 1.Bamboo, Thatch                                                                                                            | 2.Wood or logs   | 3.Plywood                                     | 4.Concrete, brick, stone |  |
|     | 5.Galvanized iron or aluminium                                                                                              | 6.Fibrous cement | 7.Makeshift, salvaged or improvised materials | 8. Other (Specify)       |  |

|     |                                                                                                                         |                                                                |                                           |                                |                      |
|-----|-------------------------------------------------------------------------------------------------------------------------|----------------------------------------------------------------|-------------------------------------------|--------------------------------|----------------------|
| G3. | What are the primary construction material of the <b>roof</b> of the housing /dwelling unit occupied by your household? |                                                                |                                           |                                |                      |
|     | 1.Thatch                                                                                                                | 2.Tiles                                                        | 3.Fibrous cement                          | 4.Galvanized iron or aluminium | 5.Salvaged materials |
|     | 6.Mixed but predominantly made of galvanized iron/aluminium, tiles or fibrous cement                                    | 7.Mixed but predominantly made of thatch or salvaged materials | 8. Concrete                               | 9.Plastic sheet                | 10.Other             |
| G4. | What is your household's main <b>source of lighting</b> ?                                                               |                                                                |                                           |                                |                      |
|     | 1.Publicly-provided electricity                                                                                         |                                                                | 2.Private-generated electricity/Generator |                                | 3.Battery            |
|     | 4. Kerosene lamp                                                                                                        |                                                                | 5. None                                   |                                | 6.Other              |



**FOOD RELATED INDICATORS**

|      |                                                                                                                                                                                                                                                                                     |        |        |
|------|-------------------------------------------------------------------------------------------------------------------------------------------------------------------------------------------------------------------------------------------------------------------------------------|--------|--------|
| G5.  | During the last 12 months, did you have a stock of rice that was sufficient for at least one month of household consumption?                                                                                                                                                        | 1. Yes | 2. No  |
| G6.  | If yes, when you had your maximum stock of rice, for how many months was it sufficient to feed your household?                                                                                                                                                                      |        | months |
| G7.  | How many times in the past 7 days did your household consume big fish, squid, shrimp and prawns, etc. If never, write '0'                                                                                                                                                           |        | times  |
| G8.  | How many times in the past 7 days did your household consume other meat (beef, pork, chicken, duck, etc.). If never, write '0'                                                                                                                                                      |        | times  |
| G9.  | In the last 12 months, has this household had enough food all days or were there days and weeks with very little or no food so that the household had to starve?                                                                                                                    | 1. Yes | 2. No  |
| G10. | How many of the last 52 weeks did the household have so little food that it was starving? Write 0 if less than 1 week                                                                                                                                                               |        | weeks  |
| G11. | In the past 7 days, how much did your household spend on <b>Food</b> , including such things as rice, meat, fruits, vegetables, and cooking oils. Include the value of any food that was produced and consumed by the household, and exclude alcohol, tobacco and restaurant meals. |        |        |

  
  
  
  
  
  


**H. HOUSEHOLD ASSETS**

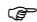

How many of the following items does the household own? (Write '0' if none)

|     |                              |        |  |
|-----|------------------------------|--------|--|
| H1. | Television                   | Number |  |
| H2. | Cellphone                    | Number |  |
| H3. | DVD-Video cassette recorders | Number |  |
| H4. | Refrigerator                 | Number |  |
| H5. | Fan                          | Number |  |
| H6. | Generator                    | Number |  |

|      |                 |        |  |
|------|-----------------|--------|--|
| H7.  | Bicycle         | Number |  |
| H8.  | Motocycle       | Number |  |
| H9.  | Cattle          | Number |  |
| H10. | Pigs            | Number |  |
| H11. | Chicken/Poultry | Number |  |

**E. LAB RESULTS:**

|     |                        |        |       |
|-----|------------------------|--------|-------|
| E1. | Dengue virus infection | 1. Yes | 2. No |
|-----|------------------------|--------|-------|
